# Supplementary material for: Quantitative imaging of volcanic SO 2 plumes using Fabry–Pérot interferometer correlation spectroscopy
Source: Copernicus journal article supplement (doi:10.5194/amt-14-295-2021), 2021-01-14

Supplement of Atmos. Meas. Tech., 14, 295–307, 2021  
<https://doi.org/10.5194/amt-14-295-2021-supplement>  
© Author(s) 2021. This work is distributed under  
the Creative Commons Attribution 4.0 License.

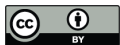

*Supplement of*

## **Quantitative imaging of volcanic SO<sub>2</sub> plumes using Fabry–Pérot interferometer correlation spectroscopy**

**Christopher Fuchs et al.**

*Correspondence to:* Christopher Fuchs ([cfuchs@iup.uni-heidelberg.de](mailto:cfuchs@iup.uni-heidelberg.de)) and Jonas Kuhn ([jkuhn@iup.uni-heidelberg.de](mailto:jkuhn@iup.uni-heidelberg.de))

The copyright of individual parts of the supplement might differ from the CC BY 4.0 License.

### Flip-book

1. Cut images 1-49 at frames
2. Sort and stack images 1-49 (1 at top, 49 bottom)
3. Align the edges precisely
4. Stamp holes and tie with cord or staple
5. Flip pages with thumb

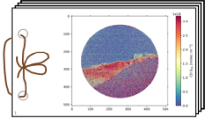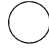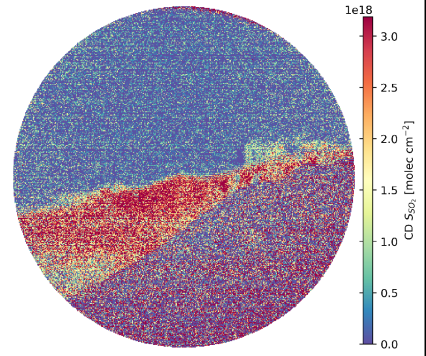

1

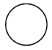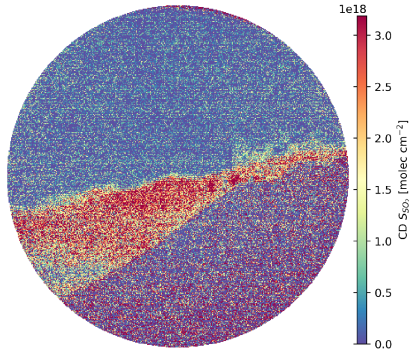

2

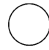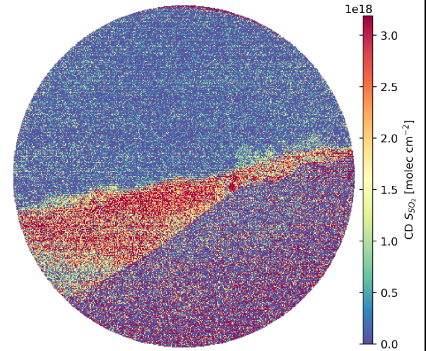

3

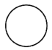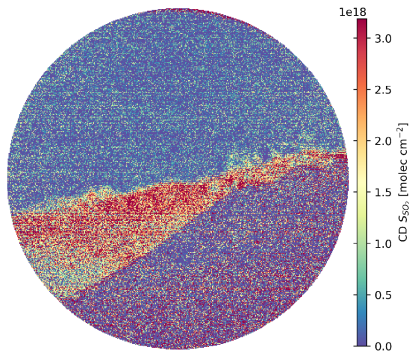

4

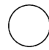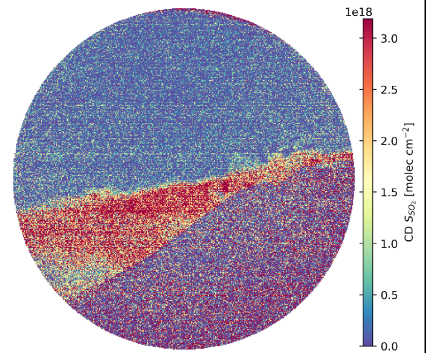

5

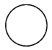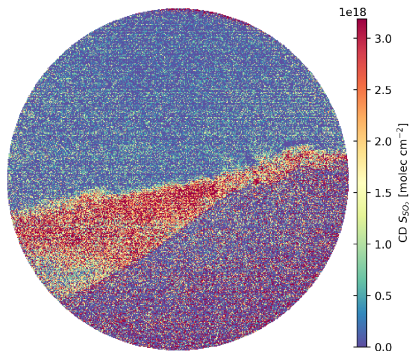

6

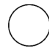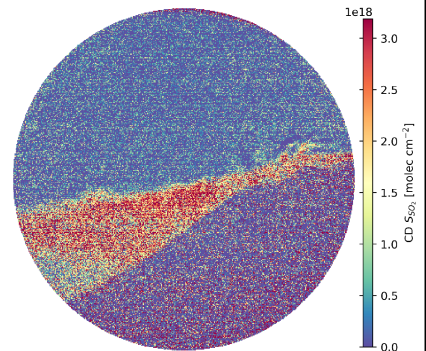

7

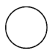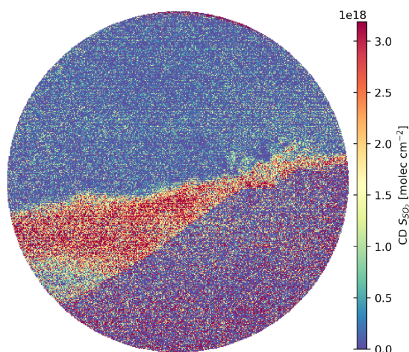

8

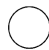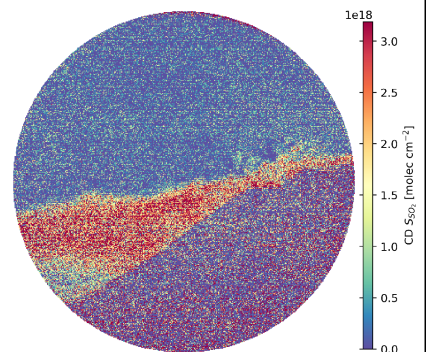

9

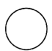

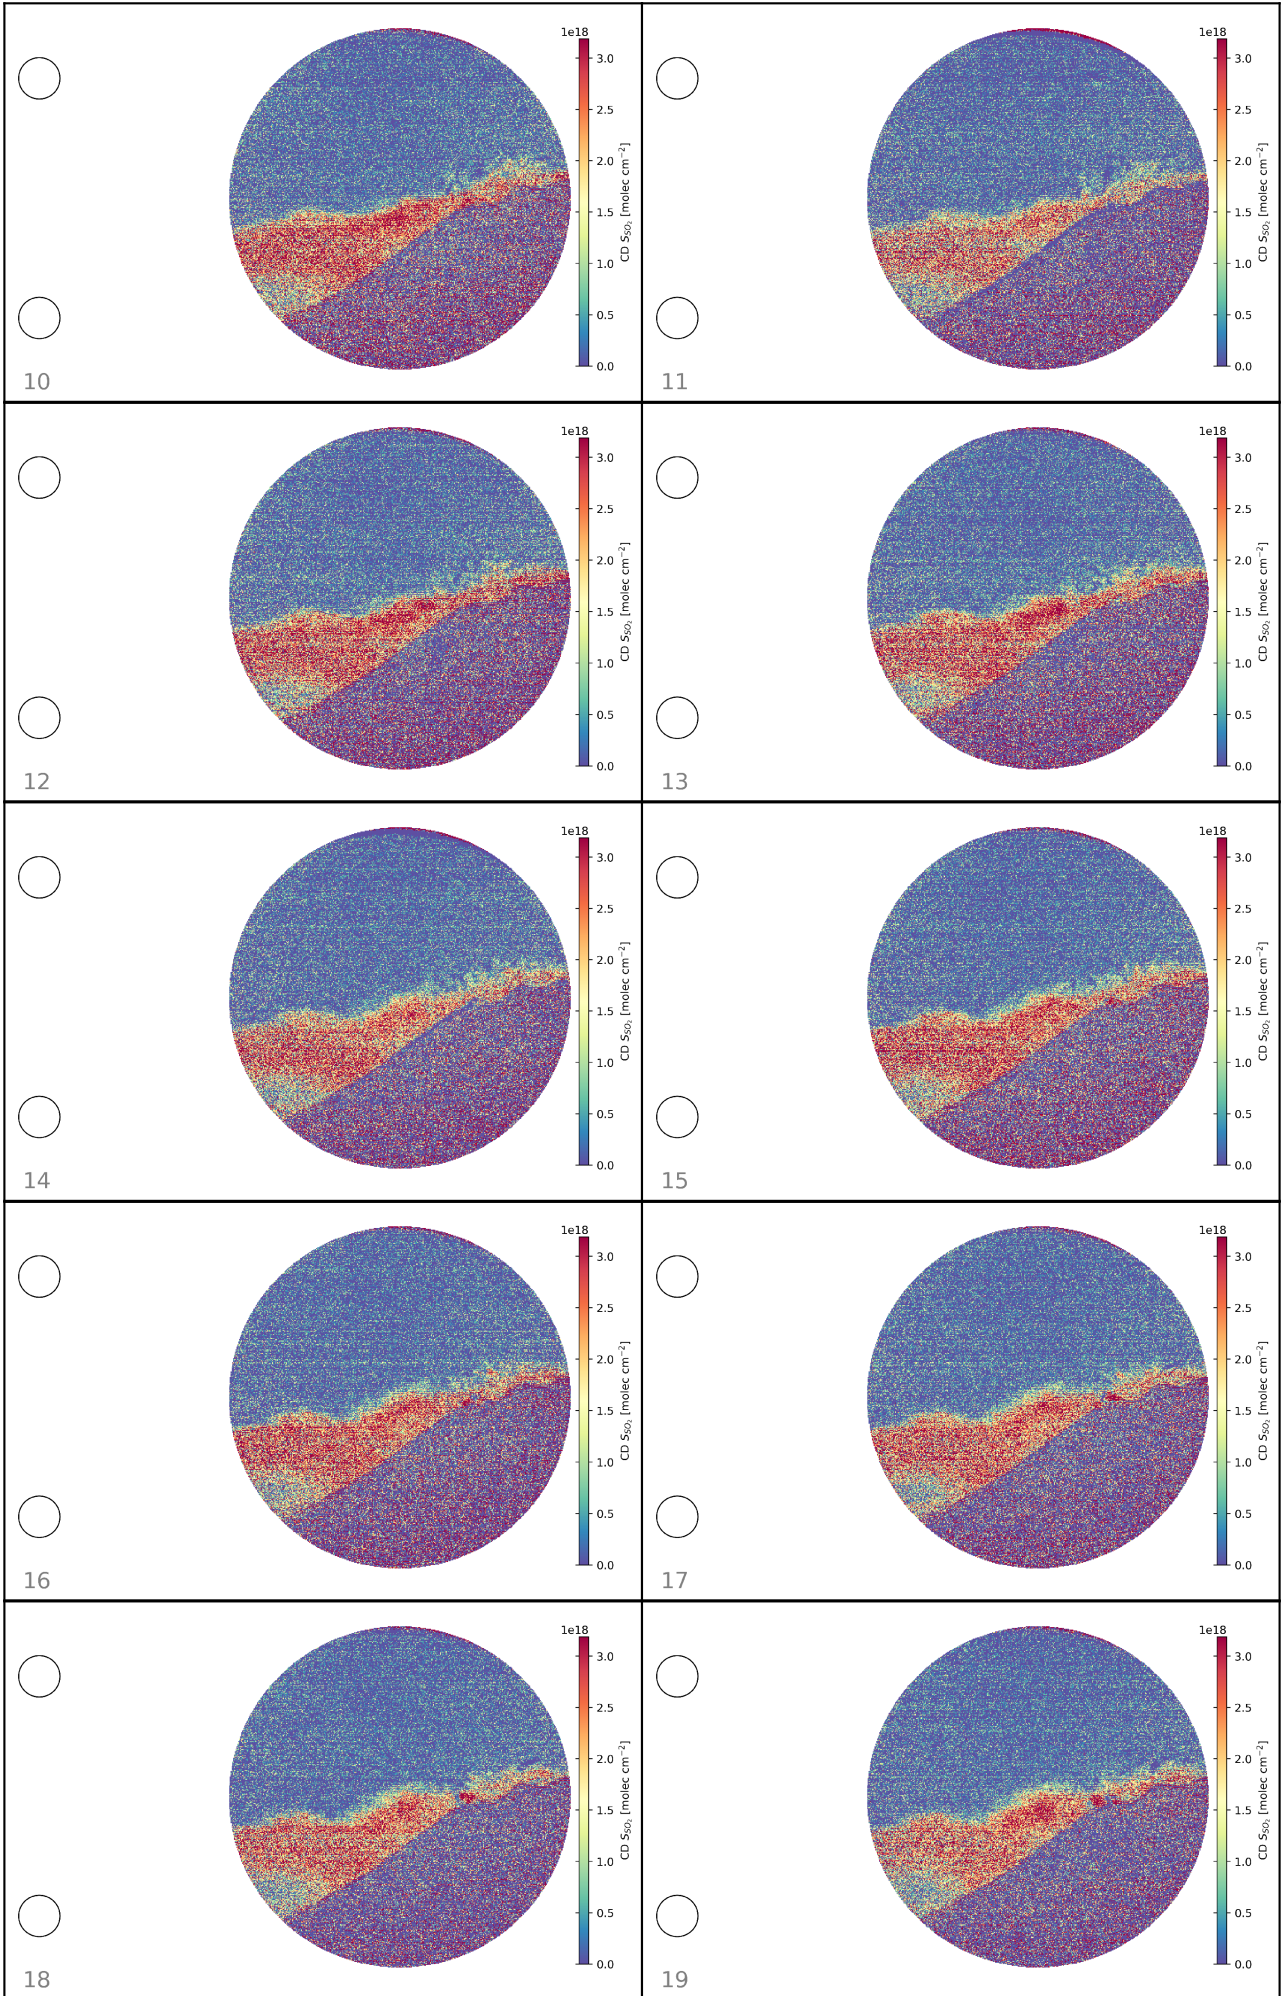

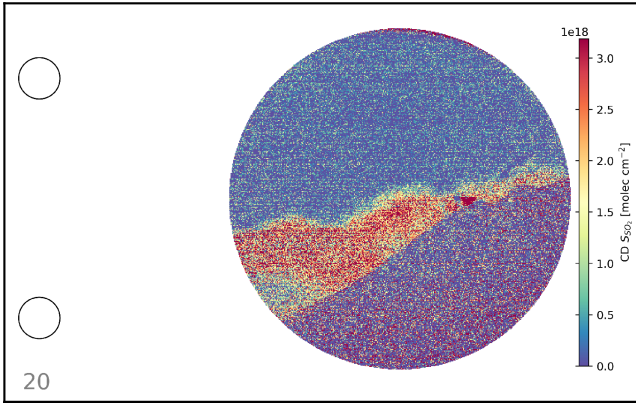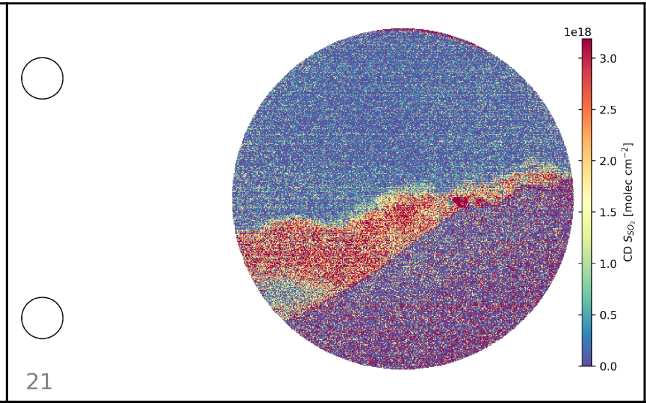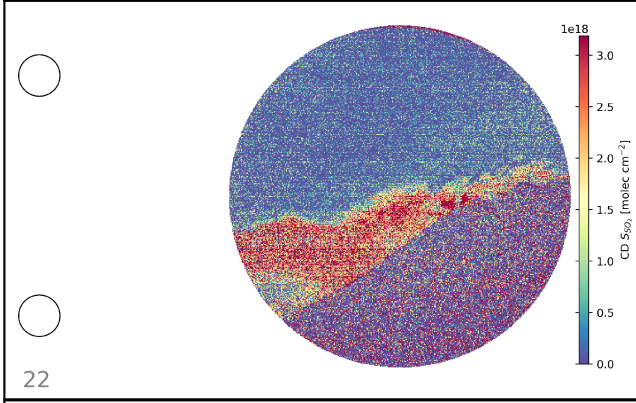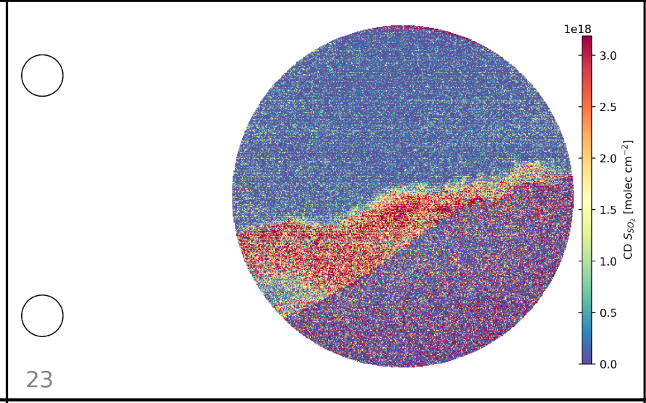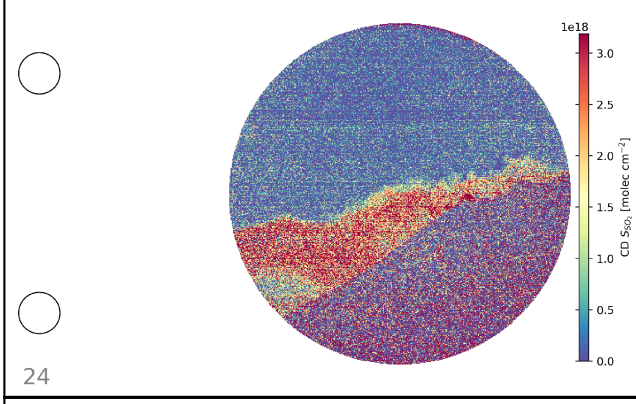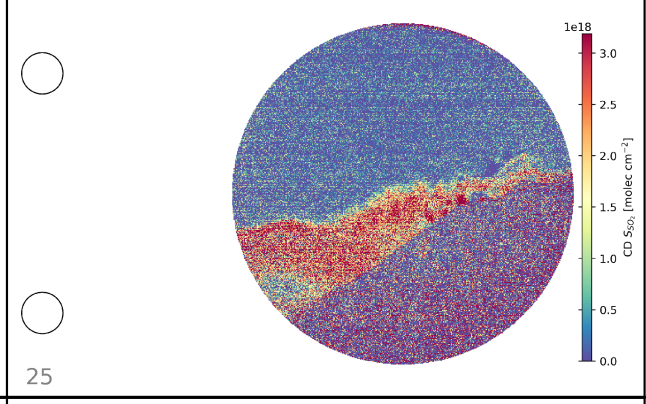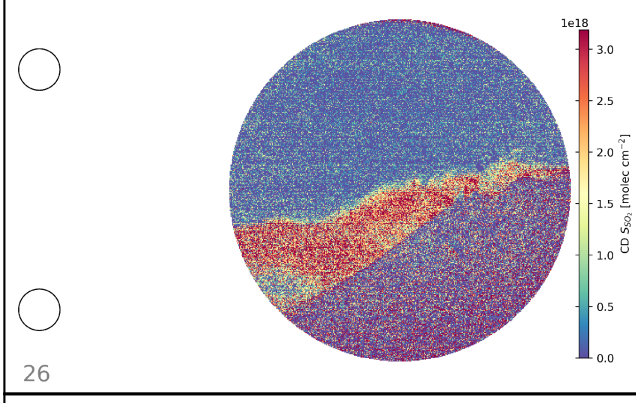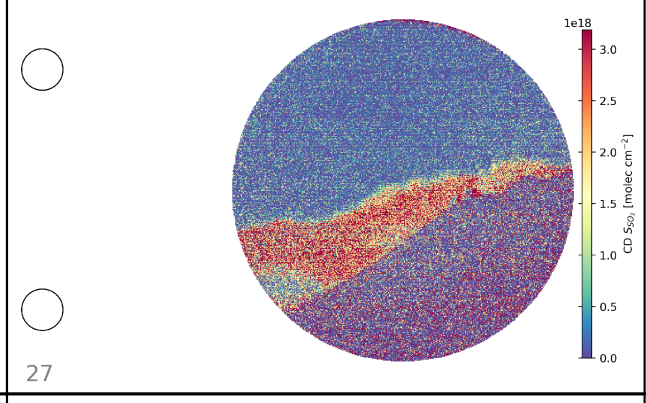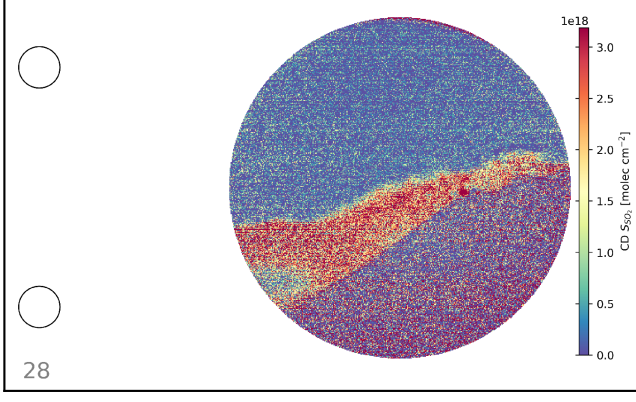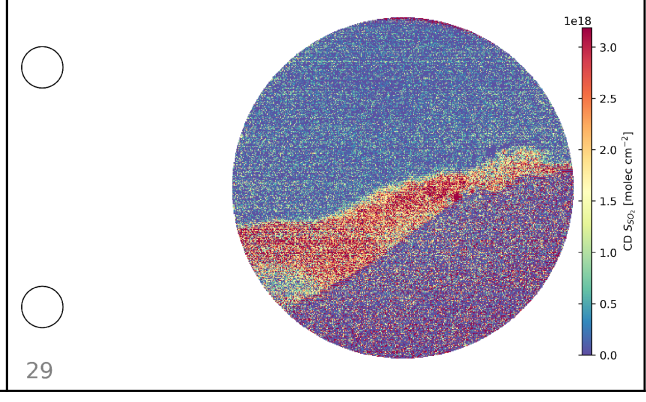

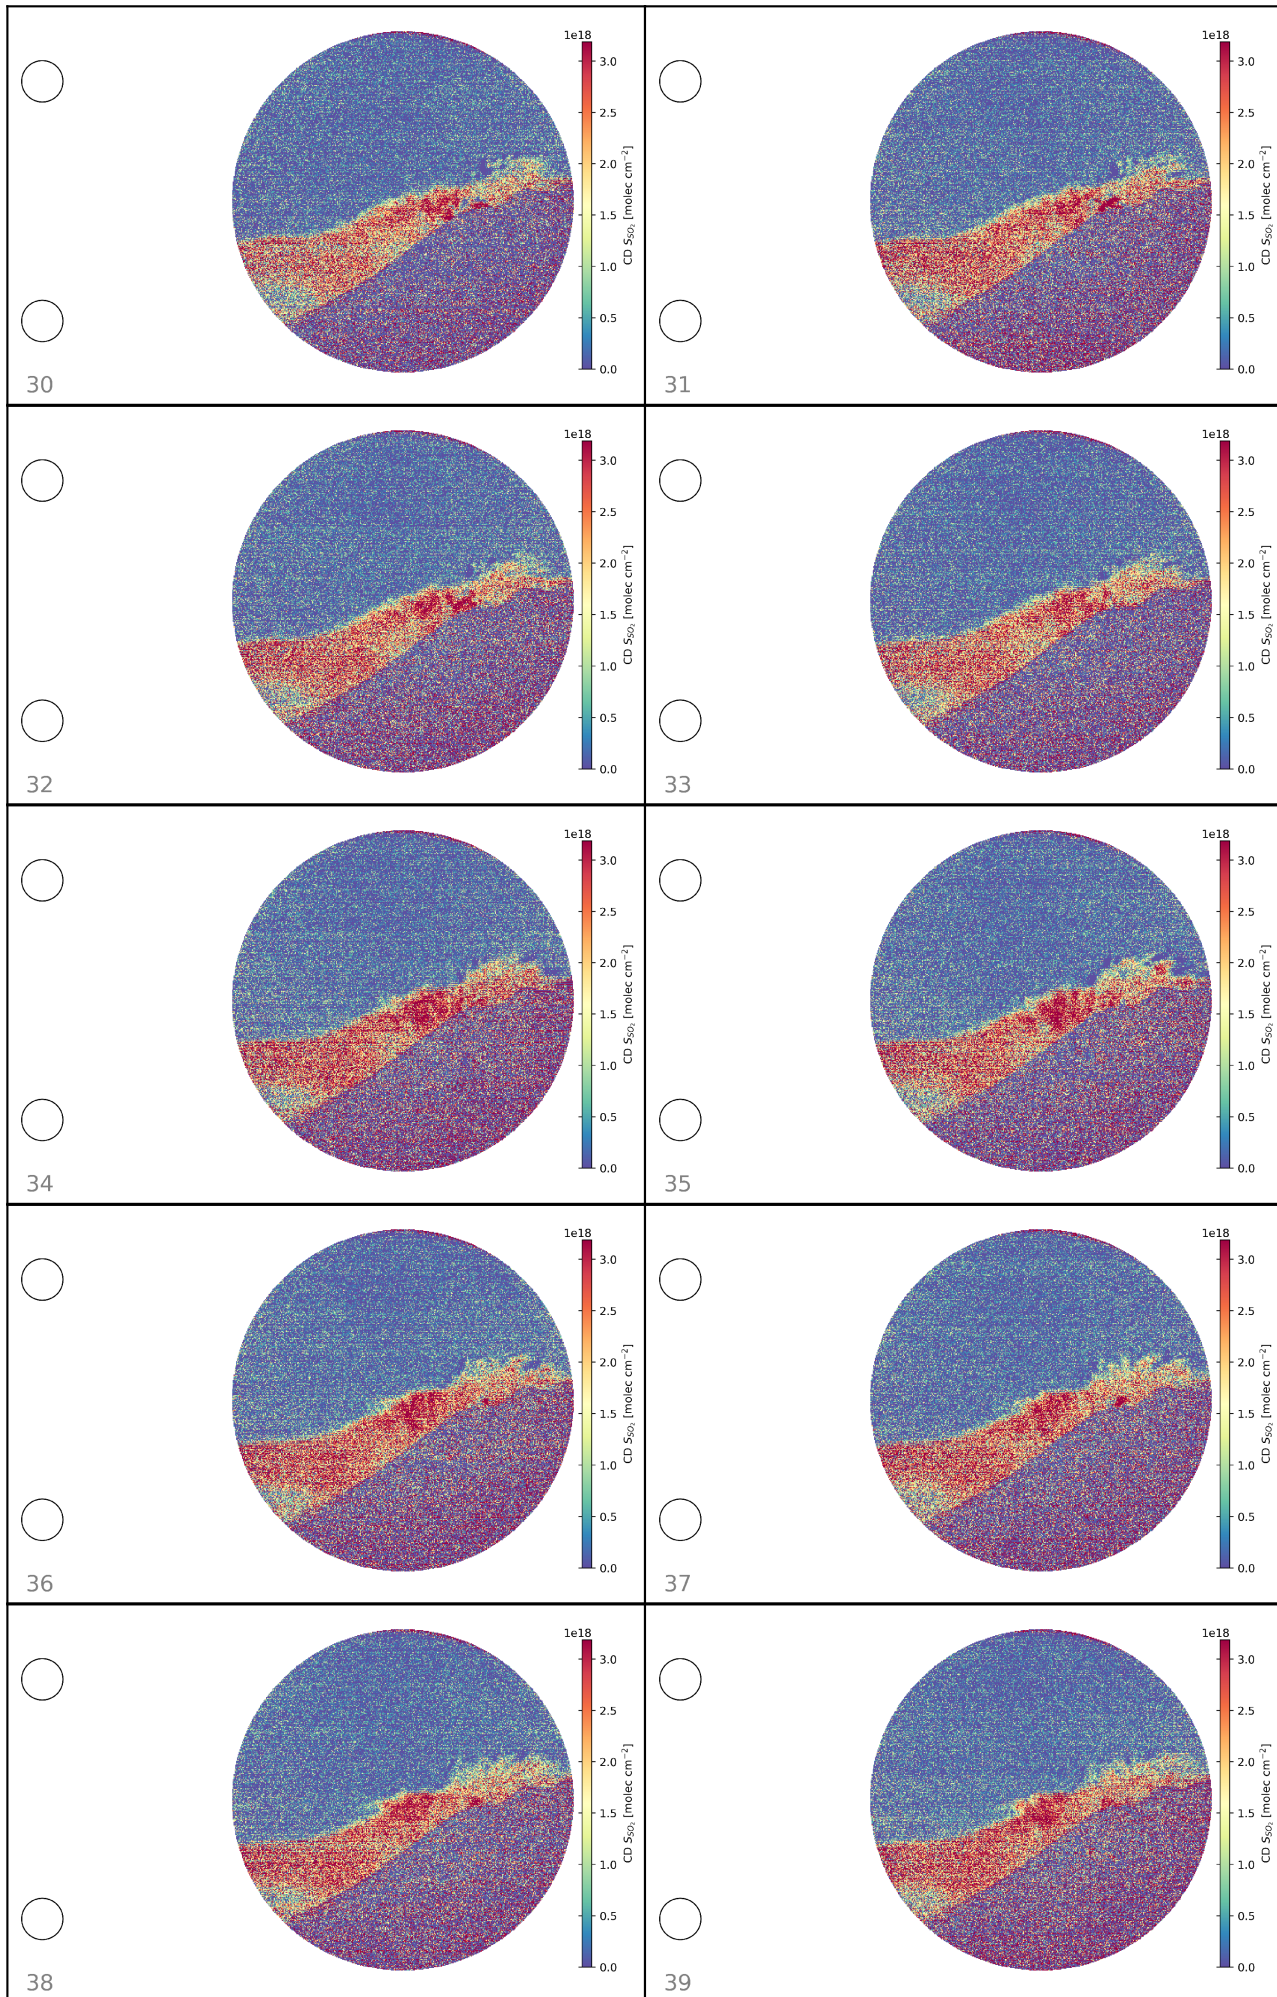

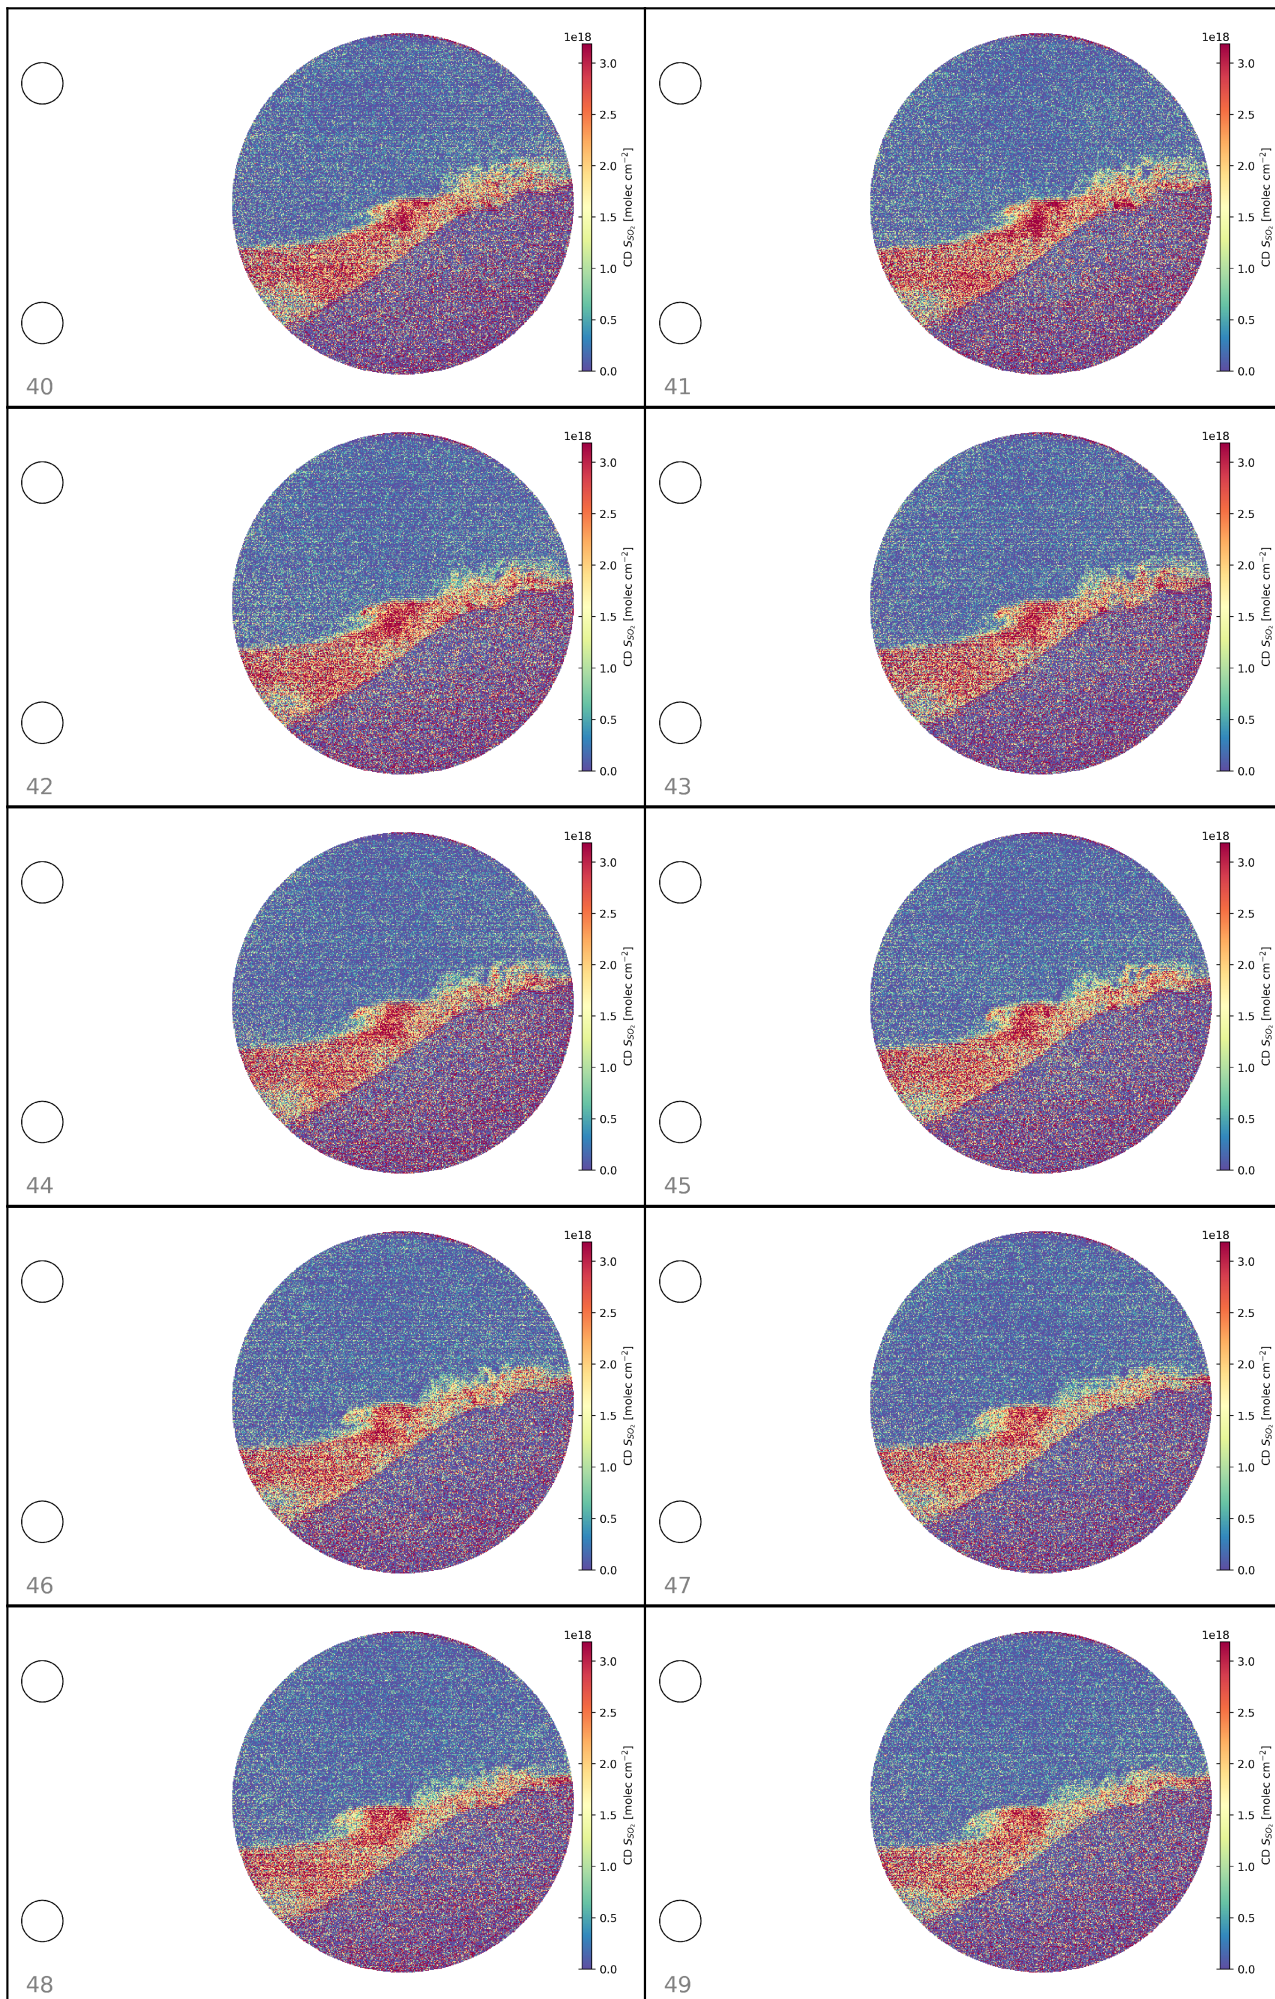

Supplement: Supplementary file [file amt-14-295-2021-supplement.pdf]
